## Correction

## Correction: Berberine induces autophagy in glioblastoma by targeting the AMPK/mTOR/ULK1-pathway

Jiwei Wang<sup>1</sup>, Qichao Qi<sup>1</sup>, Zichao Feng<sup>1</sup>, Xin Zhang<sup>1</sup>, Bin Huang<sup>1</sup>, Anjing Chen<sup>1</sup>, Lars Prestegarden<sup>2,3</sup>, Xingang Li<sup>1</sup> and Jian Wang<sup>1,2</sup>

<sup>1</sup>Department of Neurosurgery, Qilu Hospital of Shandong University and Brain Science Research Institute, Shandong University, Jinan, 250012, P.R. China

<sup>2</sup>Department of Biomedicine, University of Bergen, 5009 Bergen, Norway

<sup>3</sup>Department of Dermatology, University of Bergen, 5021 Bergen, Norway

**Published:**

**Copyright:** © 2021 Wang et al. This is an open access article distributed under the terms of the [Creative Commons Attribution License](https://creativecommons.org/licenses/by/3.0/) (CC BY 3.0), which permits unrestricted use, distribution, and reproduction in any medium, provided the original author and source are credited.

**This article has been corrected:** Due to errors during figure creation, the images of BBR 100  $\mu\text{M}$  (0 h) in both U251 and U87 in Figure 3A contain overlapping areas (row 1, panels 1 and 2 and row 1, panels 3 and 4). The corrected Figure 3A, obtained using the original data, is shown below. The authors declare that these corrections do not change the results or conclusions of this paper.

Original article: Oncotarget. 2016; 7:66944–66958. <https://doi.org/10.18632/oncotarget.11396>

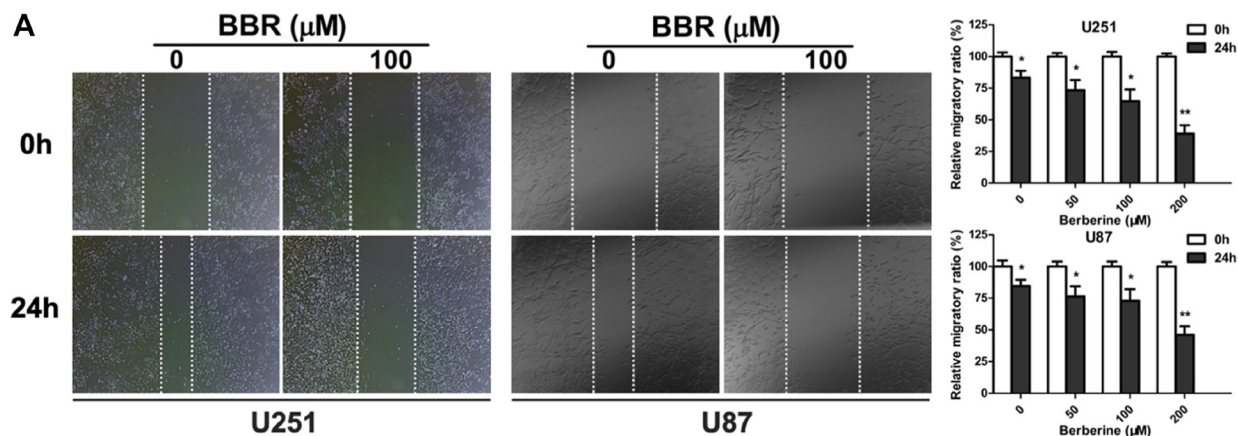

**Figure 3: BBR impairs migration and invasion in GBM cells.** (A) The migratory ability and statistical results of the migratory rate of U251 and U87 cells were evaluated by a wound healing assay treated with different concentrations of BBR for 24 h.
